# Supplementary material
Source: Springer Nature journal article supplement (https://www.springermedizin.de/resource/supplementary/12885_2007_1060_MOESM7_ESM.pdf/9471004)

KD group

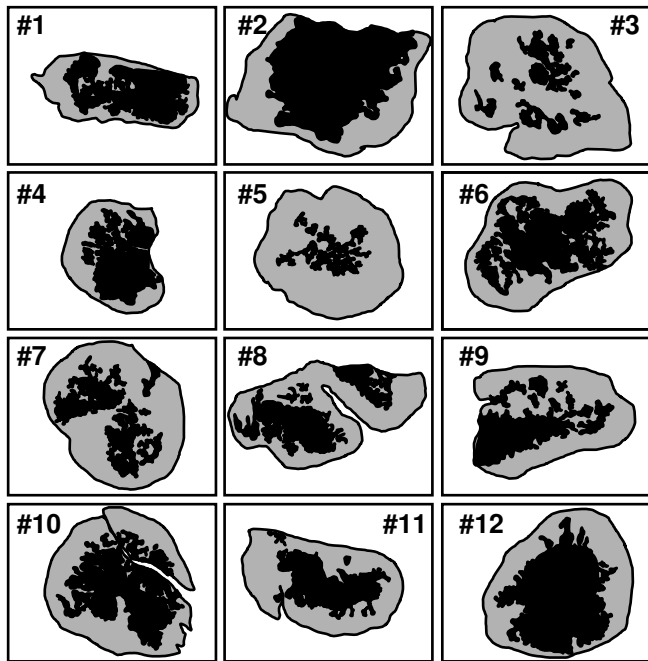

SD group

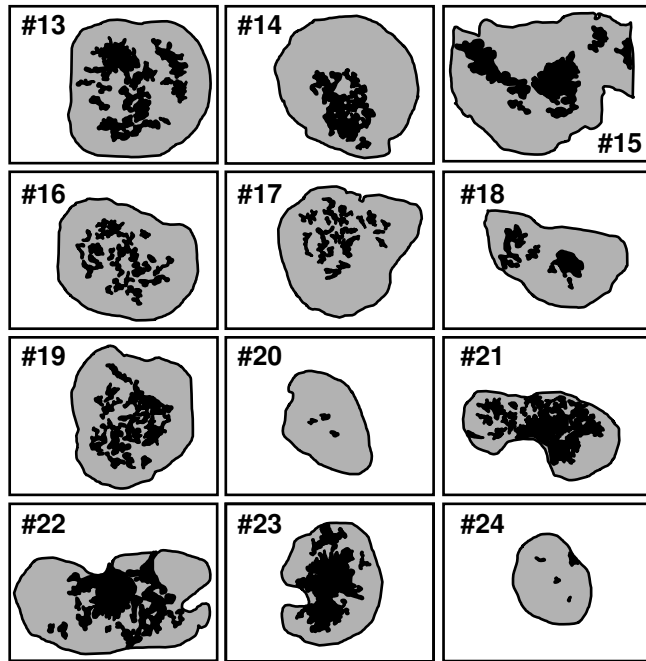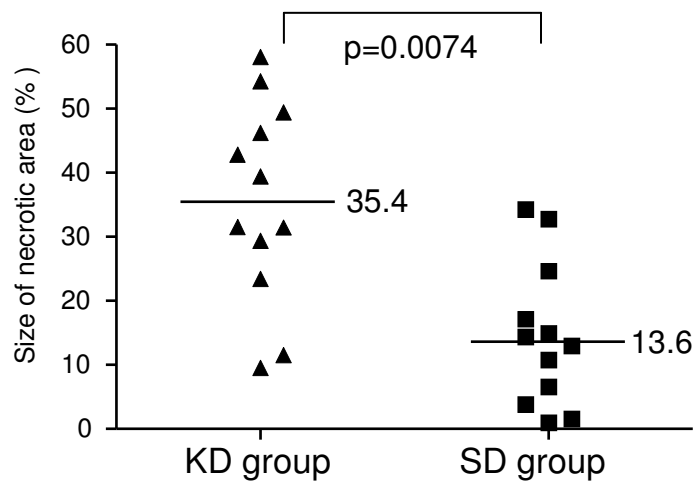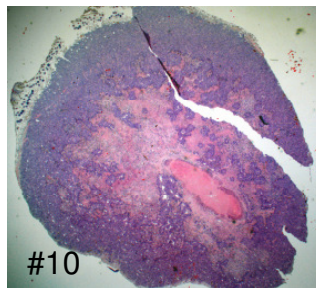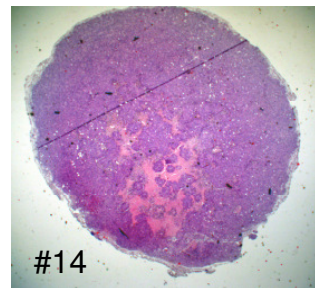

Supplement: MOESM7 [file 9471004]
